# Supplementary material for: Exploring Views of Healthcare Professionals, Researchers, and People Living with and beyond Colorectal Cancer on a Healthy-Eating and Active Lifestyle Resource
Source: MDPI journal article supplement (doi:10.3390/nu11102482), 2019-10-16
Supplement: s1 [file s1]

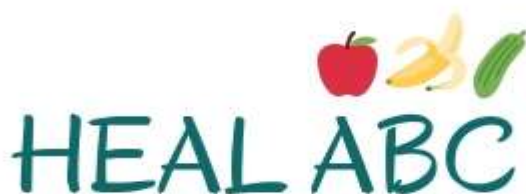

Healthy Eating and Active Lifestyle After Bowel  
Cancer

**We would now like you to complete these questions that tell us about your background.**

**These details will be kept confidential. If you do not wish to answer some of these questions you do not have to.**

## Background Information

Please answer each question or tick the relevant box.

1. **What is your age?** *(Please add your age in years)*

 Years

2. **What is your gender?** *(Please tick one of the boxes)*

Female ☐ Male ☐ Transgender ☐ Prefer not to say ☐

3. **What is your occupation?**

*(Please write on the line)*

-----

4. **What is the area of your expertise in healthcare?**

*(Please write on the line)*

-----

5. **How many years have you been working in healthcare services?**  
*(Please write on the line)*

-----

6. **What is your ethnic origin?** *(Please tick one of the boxes)*

|                         |                          |                               |                          |
|-------------------------|--------------------------|-------------------------------|--------------------------|
| British                 | <input type="checkbox"/> | <u>Black or black British</u> |                          |
| Irish                   | <input type="checkbox"/> | Caribbean                     | <input type="checkbox"/> |
| Other                   | <input type="checkbox"/> | African                       | <input type="checkbox"/> |
| <u>Mixed</u>            |                          | Other                         | <input type="checkbox"/> |
| White & Black Caribbean | <input type="checkbox"/> | <u>Asian or Asian British</u> |                          |
| White & Black African   | <input type="checkbox"/> | Indian                        | <input type="checkbox"/> |
| White & Asian           | <input type="checkbox"/> | Pakistani                     | <input type="checkbox"/> |
| Other                   |                          | Bangladeshi                   | <input type="checkbox"/> |
| <u>Chinese</u>          |                          | Other                         | <input type="checkbox"/> |
| Chinese                 | <input type="checkbox"/> | <u>Other Ethnic Group</u>     |                          |
|                         |                          | Other                         | <input type="checkbox"/> |

8. **What are the first 3 digits of your post code?**  
*(Please write in the boxes)*

|  |  |  |
|--|--|--|
|  |  |  |
|--|--|--|

**Thank you very much for completion of this questionnaire.**
