# Supplementary material for: Exploring Views of Healthcare Professionals, Researchers, and People Living with and beyond Colorectal Cancer on a Healthy-Eating and Active Lifestyle Resource
Source: MDPI journal article supplement (doi:10.3390/nu11102482), 2019-10-16
Supplement: s1 [file s1]

Table S1 Improvements suggestions based on participants feedback.

| Theme                                       | People after bowel cancer                                                                                                                                                  | Professionals                                                                                                                                                                                                                      |
|---------------------------------------------|----------------------------------------------------------------------------------------------------------------------------------------------------------------------------|------------------------------------------------------------------------------------------------------------------------------------------------------------------------------------------------------------------------------------|
| <b>Structure</b>                            |                                                                                                                                                                            |                                                                                                                                                                                                                                    |
| Overwhelmed by number of resources          | "It's probably too many booklets, I think it could be condensed slightly" [Jason, 66].                                                                                     | "I agree that you can slim it down as you have the information that is repetitive" [Researcher 1].                                                                                                                                 |
| Title of fibre and wholegrain booklets      | Not reported                                                                                                                                                               | "I think, you should be really careful, what title you are giving to each booklet. You need to make it appalling that they want to read it" [Occupational therapist].                                                              |
| <b>Lay out</b>                              |                                                                                                                                                                            |                                                                                                                                                                                                                                    |
| A4/A5 format                                | "Maybe reduce the A5 size for booklets for better handling but I like A4 size so perhaps keep it" [Eva 52].                                                                | "I would advise to do A5 leaflets" [Research nurse].                                                                                                                                                                               |
| Cultures and age inclusive                  | "Clear instructions" but need photos and symbols representing different ethnicity" [Julia, 71].                                                                            | "Make sure there are pictures of food and people of different cultures" [Dietitian 1].                                                                                                                                             |
| Playful layout                              | "At the time, they can feel ever so slightly like a child work sheets" [Megan, 35].                                                                                        | "Some of these bits I understand why they are there, but I think it undermines the evidence baseness of the workbook" [Occupational therapist].                                                                                    |
| <b>Content</b>                              |                                                                                                                                                                            |                                                                                                                                                                                                                                    |
| Being unique and have specific requirements | "It should be tailored to every person that it is given to, based on the operation that they had" [Paul, 71].                                                              | Not reported                                                                                                                                                                                                                       |
| Links to websites and services              | "I would suggest links to other websites, videos and recipes" [Anna, 49].                                                                                                  | Not reported                                                                                                                                                                                                                       |
| Complicated introduction booklet            | "I think the message is there but it is too much of it." [John, 66]. "I think its good text is big enough and not text heavy" [Rose,65].                                   | "I do think it's too much text when you open it, so I think if it would be in boxes it would look better" [Researcher 2]. "I don't know what you could remove, it's just necessary text there" [Dietitian 6].                      |
| More evidence in booklets                   | "What is this World Cancer Research Fund you are referring to everywhere? I have never heard of it" [Emma, 44].                                                            | "Could you have a page at the end of each booklet with a title something like digging deeper? Some people who are keen on this especially with higher education they might be interested to read it" [Occupational therapist].     |
| Balance bad news and restrictions           | "I would make it big that people do not need to miss out on fast food because now they can choose a healthier option even when they go out for fast food meal" [Jane, 41]. | "I was thinking it is lot of bad news, and it basically tells me not to eat it. So I was thinking you could try to make it like- it is ok to have a treat from time to time but remember and have a bit of balance" [Dietitian 6]. |
| Appealing pictures of unhealthy foods       | Not reported                                                                                                                                                               | "One thing I found about the lot of pictures, you make the pictures very appealing" [Occupational therapist].                                                                                                                      |

|                                          |                                                                                                                                                                                         |                                                                                                                                                                                                                                                                                                                                               |
|------------------------------------------|-----------------------------------------------------------------------------------------------------------------------------------------------------------------------------------------|-----------------------------------------------------------------------------------------------------------------------------------------------------------------------------------------------------------------------------------------------------------------------------------------------------------------------------------------------|
| Setting goals and planning               | "There are too many exclamation marks, it come across a bit condescending" [Anna, 49].                                                                                                  | "I think there is fairly lot of research on using this feedback but what I would remove is the exclamation marks" [Researcher 2].                                                                                                                                                                                                             |
| Upset about WCRF statement on prevention | "So, on the front page you say, eat fibre every day to help prevent cancer. Is that right? I think I followed a reasonable diet" [Paul, 71].                                            | "Some booklets, give impression that if you follow this, you will never get cancer, but we know that people still can get cancer because of other factors. I think you should be more careful with first pages of the booklets. People may think, oh I caused my cancer because I am not doing this and they become resistant" [Dietitian 6]. |
| First page in booklets                   | "Content is explained very well, sometimes with too much details" [Anna, 49].                                                                                                           | "I noticed in all booklets the first page is full of text, and this all information should be there but I can see it's better to divided it into two pages" [Dietitian 2].                                                                                                                                                                    |
| Contrast in advice provided              | "On this one, it says that with colostomy there are no restriction on fibre but dietitians say that there are restrictions. So it is contradicting what the dietitians say" [Mark, 69]. | "For recommendations to use in booklets on fibre – state to follow the advice of your dietitian based on your personal circumstances" [Dietitian 10].                                                                                                                                                                                         |
| Contrast in advice provided              | "Sometimes with our weight, you have to eat some of these stuff, pointing on sugar booklet – biscuits, cream" [Sofia, 74].                                                              | Not reported                                                                                                                                                                                                                                                                                                                                  |
