# Supplementary material for: Exploring Views of Healthcare Professionals, Researchers, and People Living with and beyond Colorectal Cancer on a Healthy-Eating and Active Lifestyle Resource
Source: MDPI journal article supplement (doi:10.3390/nu11102482), 2019-10-16
Supplement: s1 [file s1]

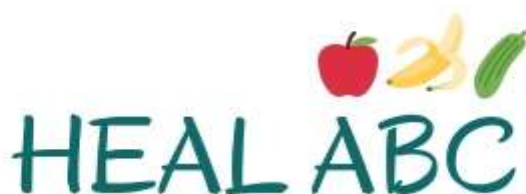

Healthy Eating and Active Lifestyle After Bowel  
Cancer

**We would now like you to complete these questions that tell us about your background.**

**These details will be kept confidential. If you do not wish to answer some of these questions you do not have to.**

## Background Information

Please answer each question or tick the relevant box.

1. **What is your age?** *(Please add your age in years)*

 Years

2. **What is your gender?** *(Please tick one of the boxes)*

Female ☐ Male ☐ Transgender ☐ Prefer not to say ☐

3. **What is your marital status?** *(Please tick one of the boxes)*

Single ☐ Living with partner ☐ Married ☐  
Separated/divorced ☐ Widowed ☐

4. **What is your occupation (previous occupation if retired)?**  
*(Please write on the line)*

-----

5. **What is the highest level of education you achieved?**

(Please tick one of the boxes)

- |                            |                          |
|----------------------------|--------------------------|
| No formal qualifications   | <input type="checkbox"/> |
| Trade qualification or NVQ | <input type="checkbox"/> |
| GCSE level/or equivalent   | <input type="checkbox"/> |
| A Level/or equivalent      | <input type="checkbox"/> |
| Higher Education Diploma   | <input type="checkbox"/> |
| Degree/or equivalent       | <input type="checkbox"/> |
| Higher degree (MSc/PhD)    | <input type="checkbox"/> |

6. **What is your ethnic origin?** (Please tick one of the boxes)

- |                         |                          |                               |                          |
|-------------------------|--------------------------|-------------------------------|--------------------------|
| British                 | <input type="checkbox"/> | <u>Black or black British</u> |                          |
| Irish                   | <input type="checkbox"/> | Caribbean                     | <input type="checkbox"/> |
| Other                   | <input type="checkbox"/> | African                       | <input type="checkbox"/> |
| <u>Mixed</u>            |                          | Other                         | <input type="checkbox"/> |
| White & Black Caribbean | <input type="checkbox"/> | <u>Asian or Asian British</u> |                          |
| White & Black African   | <input type="checkbox"/> | Indian                        | <input type="checkbox"/> |
| White & Asian           | <input type="checkbox"/> | Pakistani                     | <input type="checkbox"/> |
| Other                   |                          | Bangladeshi                   | <input type="checkbox"/> |
| <u>Chinese</u>          |                          | Other                         | <input type="checkbox"/> |
| Chinese                 | <input type="checkbox"/> | <u>Other Ethnic Group</u>     |                          |
|                         |                          | Other                         | <input type="checkbox"/> |

7. **What is the total income coming into your household each month?**

(Please tick one of the boxes)

- Under £250 ☐      £251 to 500 ☐      £501 to 1000 ☐
- £1001 to 2000 ☐      over £2000 ☐      Do not want to answer this question ☐

8. **What are the first 3 digits of your post code?**

(Please write in the boxes)

|  |  |  |
|--|--|--|
|  |  |  |
|--|--|--|

9. **When did you have your colorectal surgery?**

(Please write in the boxes)

|       |                                                          |      |                                                          |
|-------|----------------------------------------------------------|------|----------------------------------------------------------|
| Month | <input style="width: 120px; height: 25px;" type="text"/> | Year | <input style="width: 100px; height: 25px;" type="text"/> |
|-------|----------------------------------------------------------|------|----------------------------------------------------------|

10. **Where about in your gut was your surgery?**

*(Please write in the boxes)*

|                  |                          |
|------------------|--------------------------|
| Bowel            | <input type="checkbox"/> |
| Rectum           | <input type="checkbox"/> |
| Bowel and rectum | <input type="checkbox"/> |
| Other            | <input type="checkbox"/> |

11. **Please list all other medical problem you have where you are under a Hospital doctor.** *(Please write on the lines)*

-----

-----

-----

-----

-----

12. **Do you have a stoma?** *(Please tick one of the boxes)*

|     |                          |    |                          |
|-----|--------------------------|----|--------------------------|
| Yes | <input type="checkbox"/> | No | <input type="checkbox"/> |
|-----|--------------------------|----|--------------------------|

13. **How many of these recommendations do you meet?** *(Please tick all the boxes that you would say yes to)*

|                                                                                  |                          |
|----------------------------------------------------------------------------------|--------------------------|
| Would you consider you are a healthy weight for your height?                     | <input type="checkbox"/> |
| Are you moderately active for at least 30 minutes a day?                         | <input type="checkbox"/> |
| Do you eat 5 portions of fruit or vegetables a day?                              | <input type="checkbox"/> |
| Do you have a lot of sweet foods (cakes, biscuits, sugar, sweets) in your diet?  | <input type="checkbox"/> |
| Do you have a lot of foods high in fat in your diet (chips, pies, cakes, cream)? | <input type="checkbox"/> |
| Do you have red meat more than three times a week?                               | <input type="checkbox"/> |
| Do you drink alcohol?                                                            | <input type="checkbox"/> |
| When you drink alcohol, do you drink more than once a week?                      | <input type="checkbox"/> |
| When you drink alcohol do you have more than 2 alcoholic drinks?                 | <input type="checkbox"/> |

14. What is your smoking status? *(Please tick one of the boxes)*

|                |                          |
|----------------|--------------------------|
| Current smoker | <input type="checkbox"/> |
| Ex-smoker      | <input type="checkbox"/> |
| Never smoked   | <input type="checkbox"/> |

**Thank you very much for completion of this questionnaire.**
