# Supplementary material for: Exploring Views of Healthcare Professionals, Researchers, and People Living with and beyond Colorectal Cancer on a Healthy-Eating and Active Lifestyle Resource
Source: Nutrients. 2019 Oct 16;11(10):2482. doi: 10.3390/nu11102482 (PMC6835229; doi:10.3390/nu11102482)
Supplement: Supplementary file 1 [file nutrients-11-02482-s001.zip]

Archive with 4 entries (4 files):
- Appendix A.pdf
- Appendix B.pdf
- Appendix C.pdf
- Table S1 Improvements suggestions based on participants feedback.pdf
